# Supplementary material
Source: PubMed Central journal article supplement (PMC6795498)
Supplement: jciinsight-4-130978-s208.pdf [file jciinsight-4-130978-s208.pdf]

# **Supplementary Materials**

*Antisense regulation of atrial natriuretic peptide expression*

Celik et al

Supplementary Figures

Supplementary Tables

## Supplementary Figures

## Supplementary Figure 1

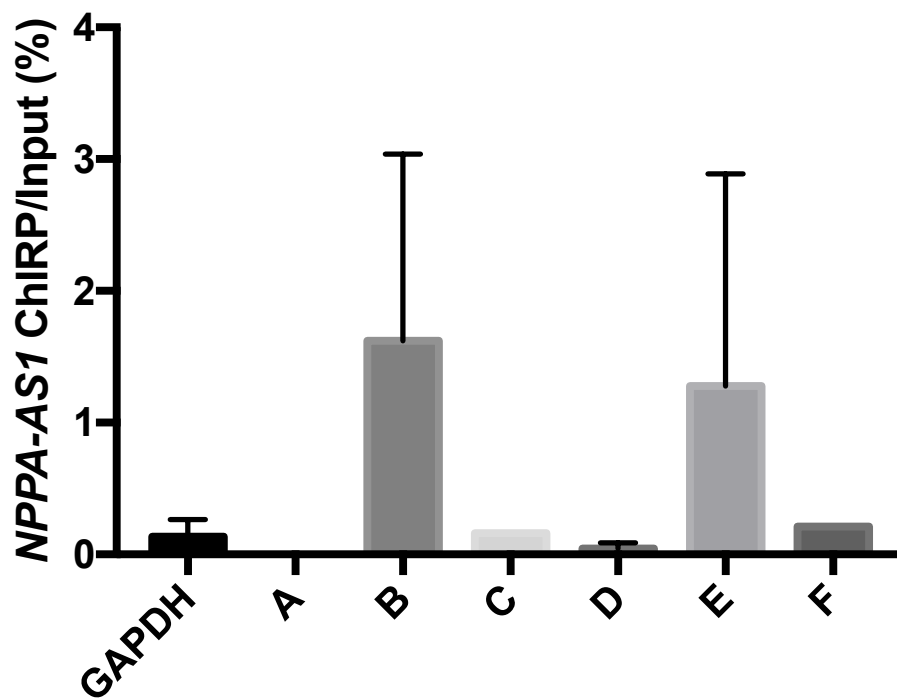

Figure S1. *NPPA-AS1* ChIRP of human ventricular tissue. qRT-PCR analysis of human ventricular DNA co-precipitated with probes specific for *NPPA-AS1*, n=2. Primers specific for six regions in the *NPPA* promoter (A-E) and a region of the *GAPDH* promoter were used to quantify the co-precipitated DNA. Mean and standard deviation is indicated.

## Supplementary Figure 2

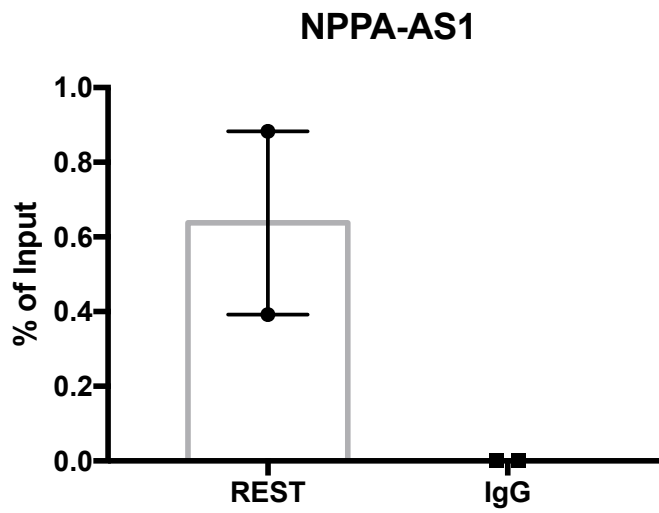

Figure S2. Quantification of *NPPA-AS1* in RNA immunoprecipitated with a REST antibody. qRT-PCR analysis of RNA immunoprecipitated with either REST or IgG control antibody. N=2 d)

### Supplementary Figure 3

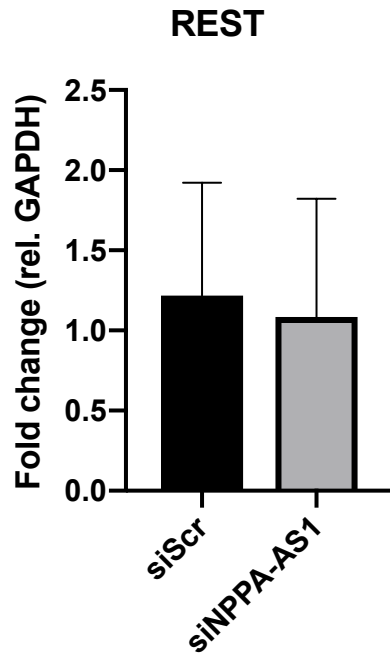

Figure S3. qRT-PCR quantification of *REST* gene expression in iPS-CM transfected with siRNA specific for *NPPA-AS1*. Results are expressed relative to *GAPDH* and normalized to the mean of the control group. Results are based on two separate experiments with three replicates each. Mean and standard deviation is shown.

## Supplementary Figure 4

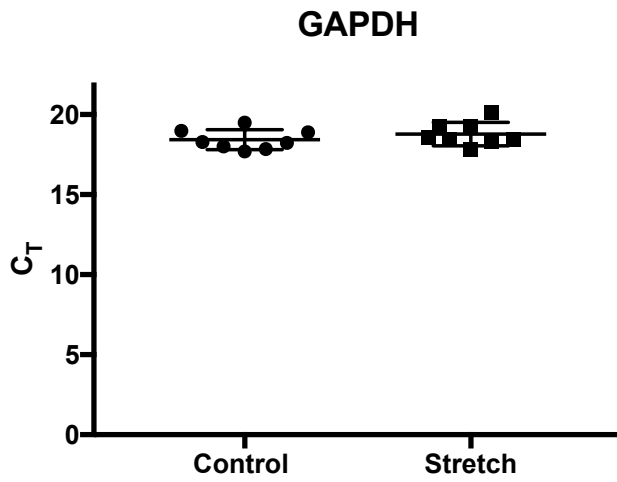

Figure S4. Effect of stretch on *GAPDH* expression. qRT-PCR C<sub>T</sub>-values for GAPDH from iPS-CM subjected to 48 hours of stretch or unstretched cells. Data comes from two separate experiments with 4 replicates in each group.

### Supplementary Figure 5

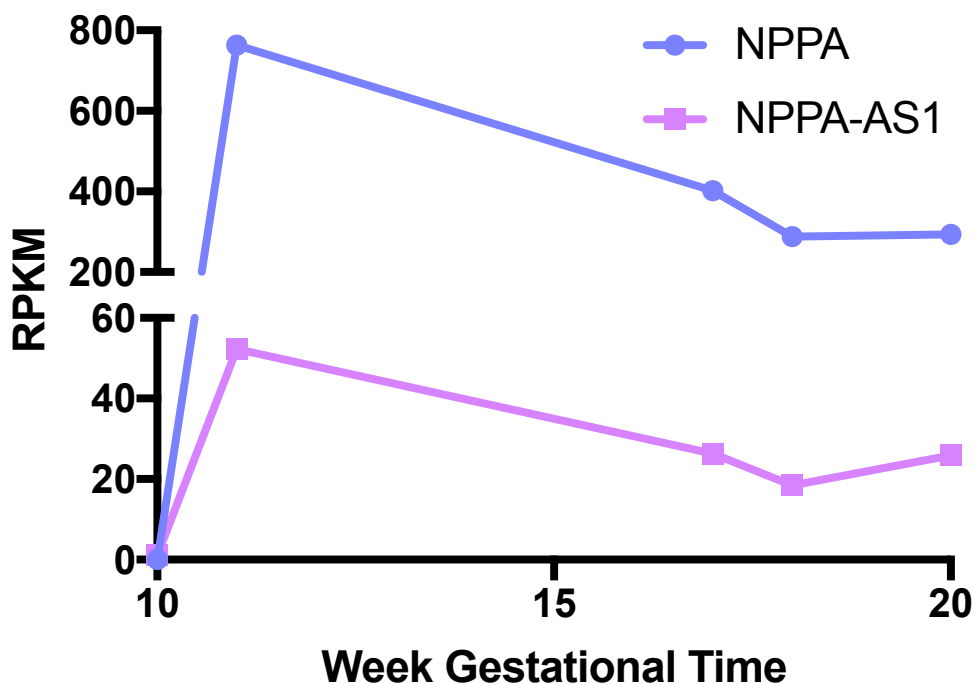

Figure S5. RNA-Seq of human fetal cardiac tissue at different gestational time points (extracted from Gene Expression Omnibus #GSE64283). Fetal tissue was collected at gestational week 10, 11, 17, 18 and 20 and sequenced using Illumina TruSeq Stranded Total RNA with Ribo-Zero Gold sample prep kit. RPKM: Reads per Kilobase Million.

### Supplementary Figure 6

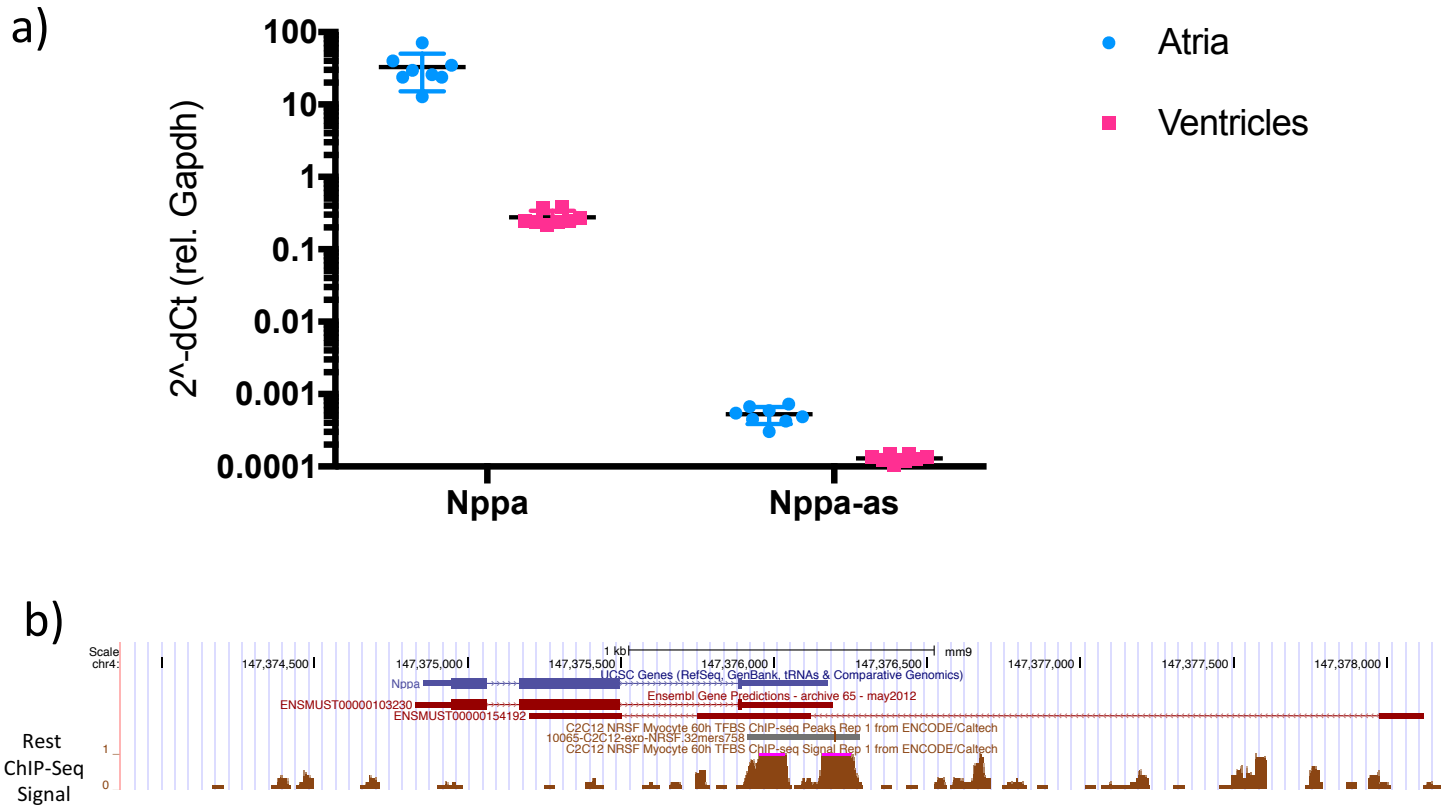

Figure S6. a) Expression of *Nppa* and *Nppa-as* in mouse atria and ventricles. RNA was extracted from atria and ventricles of mouse hearts (n=8) and qRT-PCR was used to assess the relative levels of *Nppa* and *Nppa-as*. Results are expressed relative to Gapdh. Mean and standard deviation is shown. b) Overview of the *Nppa* locus including ENCODE/Caltech Rest ChIP-Seq data from the mouse myocyte cell line C2C12.



### Supplementary Figure 7

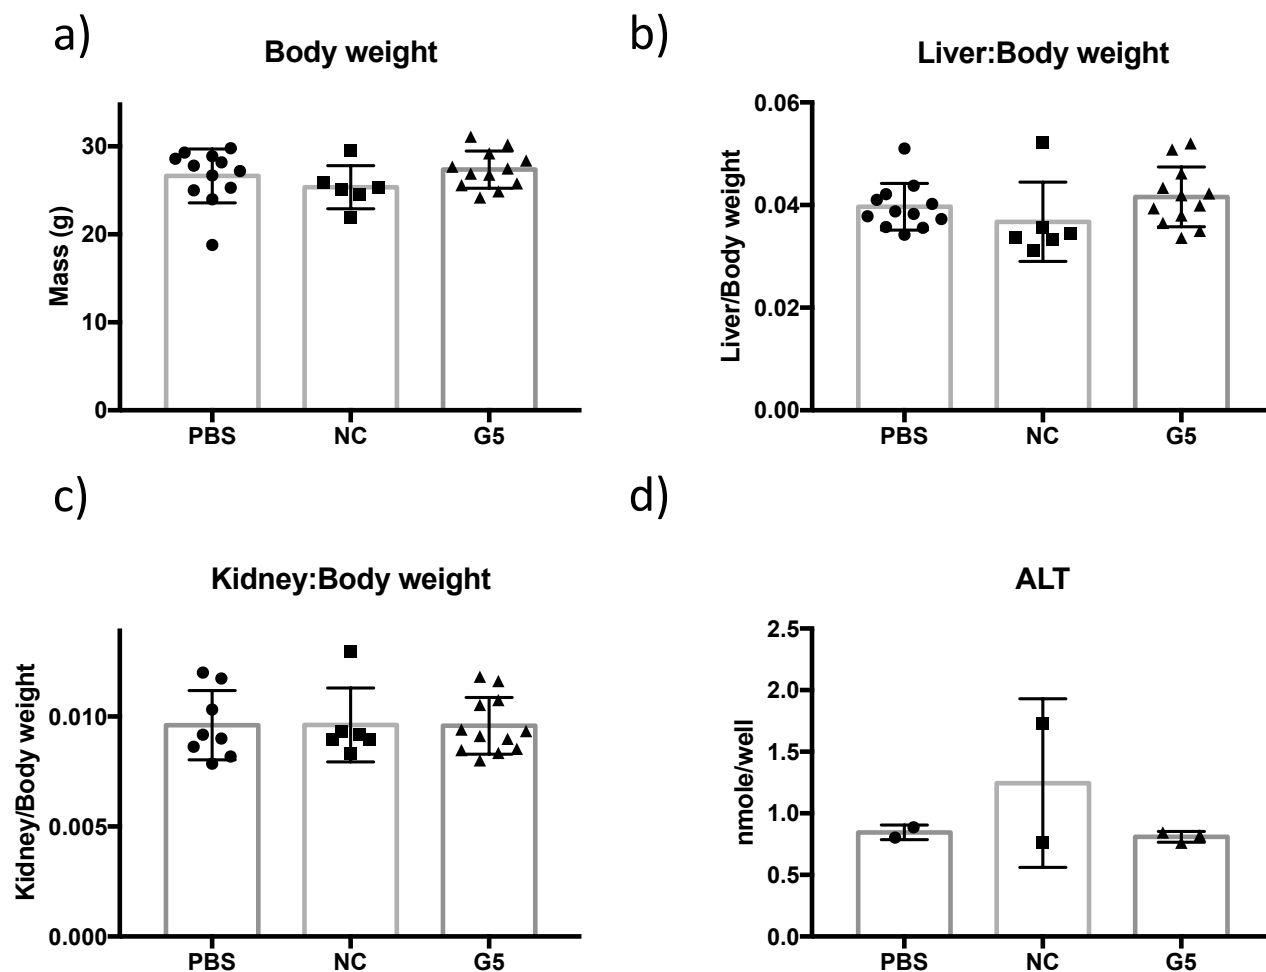

Figure S7. Assessment of toxicity of GapmeR injections. Mice were injected subcutaneously with PBS or 25 mg/kg of G5 or negative control GapmeR. 48 hours after injection, body weight (a), liver (b) and kidney (c) weight was recorded. Plasma alanine aminotransferase (d) was analyzed in a subset of animals.

## Supplementary Figure 8

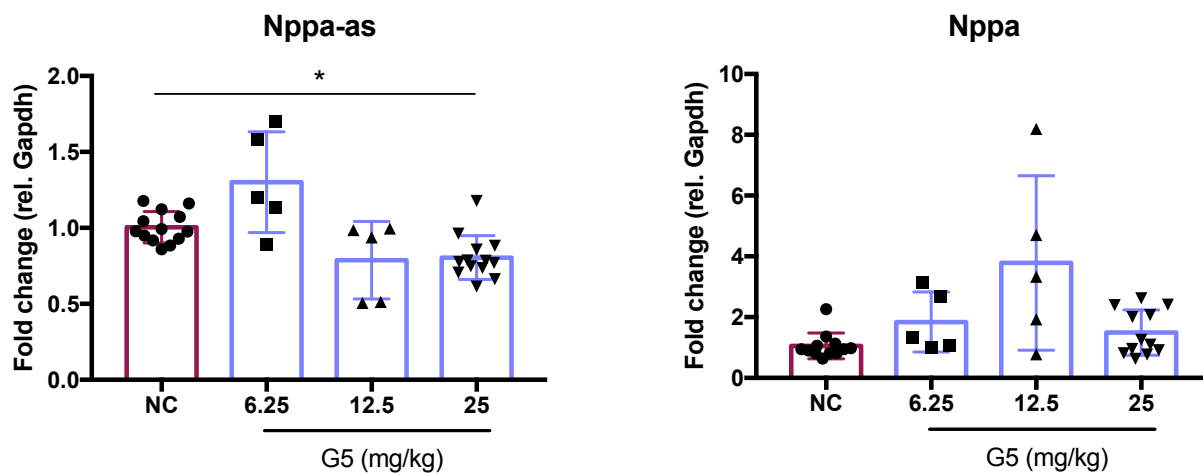

Figure S8. *Nppa* and *Nppa-as* expression in *GapmeR*-injected mice. *Nppa* and *Nppa-as* expression levels in ventricular tissue of mice injected intraperitoneally with different doses of *GapmeR5* (G5) or 25 mg/kg negative control (NC) for 48h. Results are expressed relative to *Gapdh* and normalized to the mean of the negative control group (n=5-13). Mean and standard deviation is shown. Kruskal-Wallis was used to test the difference between animals treated with negative control and each of the G5 doses, as well as within G5 treatment groups. \* $p < 0.05$  after adjustment for multiple comparisons using Dunn's test.

## Supplementary Tables

Supplementary Table 1. Primer and probe sequences

**NPPA-AS1 FISH Probes**

| Probe ID   | Sequence              |
|------------|-----------------------|
| NPPA-AS_1  | agcaaggtgccgatgactc   |
| NPPA-AS_2  | tctgatggttcaaaaccacc  |
| NPPA-AS_3  | ggggaagtcaaaaagtcca   |
| NPPA-AS_4  | caggaagtgggaagatcctt  |
| NPPA-AS_5  | tgattctactctgcttctg   |
| NPPA-AS_6  | aaagatggccaggaactcg   |
| NPPA-AS_7  | ccgggttctctagaaaagta  |
| NPPA-AS_8  | aagtcctctcacacattta   |
| NPPA-AS_9  | tgatgtgtcactggcatc    |
| NPPA-AS_10 | attcctaaacctagtcatga  |
| NPPA-AS_11 | ttgagaattttctcagtgcc  |
| NPPA-AS_12 | gtcccaataaagggaaggac  |
| NPPA-AS_13 | tagcagagataccgtgtaa   |
| NPPA-AS_14 | gagtgttccttaaaacca    |
| NPPA-AS_15 | aaaccacagggcaagaccag  |
| NPPA-AS_16 | ggcgggtggttctaaggagag |
| NPPA-AS_17 | tatcagattgaccatccagg  |
| NPPA-AS_18 | ggtagacgtaaatctgatcc  |
| NPPA-AS_19 | gcagatggagagaaactgc   |
| NPPA-AS_20 | gttactgggagactgggaat  |
| NPPA-AS_21 | gcttcacaggaagaccggag  |
| NPPA-AS_22 | tgatgccaagatcctctgag  |
| NPPA-AS_23 | ctgctttcagctaacttgg   |
| NPPA-AS_24 | agagttgagtgaagctgctt  |
| NPPA-AS_25 | gctcagaagtgccttctttc  |
| NPPA-AS_26 | tgttcatctttcagtgtca   |
| NPPA-AS_27 | tgctagcaggagagatgaa   |
| NPPA-AS_28 | caatctgtgtgtgggcaac   |
| NPPA-AS_29 | agcagatcagagacagaggc  |
| NPPA-AS_30 | tgatggaacagccactctg   |
| NPPA-AS_31 | atggatgcaggagctgaact  |
| NPPA-AS_32 | attcactcagaacacttg    |
| NPPA-AS_33 | ccttgcgttttactctttg   |
| NPPA-AS_34 | ggaagagaattcagccgat   |
| NPPA-AS_35 | aagacaaatgcctgcgttgg  |
| NPPA-AS_36 | gctgttactgaaagtggttt  |
| NPPA-AS_37 | cttgatttctccaagtcag   |
| NPPA-AS_38 | aaggtaggccaggaaagcg   |
| NPPA-AS_39 | caacgcagacctgatggatt  |
| NPPA-AS_40 | agagctaattccatgtacaa  |

**NPPA-AS1 ChIRP Probes**

| Probe ID    | Sequence              |
|-------------|-----------------------|
| NPPA-AS1_1  | gctctgatggttcaaaacca  |
| NPPA-AS1_2  | caaagatggccaggaact    |
| NPPA-AS1_3  | cctagtcatgaactgtatgt  |
| NPPA-AS1_4  | gagtggttcccttaaaacca  |
| NPPA-AS1_5  | gacctccaggggttattag   |
| NPPA-AS1_6  | agaacagtggttactgggaga |
| NPPA-AS1_7  | cttcagtaactttgggtgg   |
| NPPA-AS1_8  | tcactttcagtggtcactg   |
| NPPA-AS1_9  | caatctgtgtgtgggcaac   |
| NPPA-AS1_10 | cagatcagagacagaggccg  |
| NPPA-AS1_11 | aattccactcagaacacttg  |
| NPPA-AS1_12 | ggaagagaattcagccgat   |
| NPPA-AS1_13 | cttgatttctccaagtcag   |
| NPPA-AS1_14 | agagctaattccatgtacaa  |

**Ribonuclease protection assay primers**

| Primer ID           | Sequence              |
|---------------------|-----------------------|
| Overlapping FWD     | gacacggcattgtacatggg  |
| Overlapping REV     | agcagtggttctccttga    |
| Non-overlapping FWD | gggcagatcagatcagaggag |
| Non-overlapping REV | tagaagatgaggtcgtgcc   |

**Site-directed mutagenesis primers**

| Primer ID     | Sequence                    |
|---------------|-----------------------------|
| dREST_FWD     | ggagggtcgcggggacatggaag     |
| dREST_REV     | gaggacgcagccaattcatttctcgtt |
| dREST_Seq_FWD | gtcattctattctggggg          |
| dREST_Seq_REV | ttgttctcgtgggcttggc         |

Supplemental Table 1. Primers and probe sequences. Continued.

*Primers for ChIRP and ChIP-qPCR*

| Primer ID             | Sequence              |
|-----------------------|-----------------------|
| Region A FWD          | gagagacagaacctcccc    |
| Region A REV          | caagccctcgggatataa    |
| Region B FWD          | gttatcatcccagggtctt   |
| Region B REV          | acaccttgaagtggagacc   |
| Region C FWD          | tgactcaagagctcccaact  |
| Region C REV          | acggcgtgagataaccaag   |
| Region D FWD          | aaacagaggtgacgttgg    |
| Region D REV          | tatttggagccctgacagc   |
| Region E FWD          | ctctccatggtcagcgaaa   |
| Region E REV          | tggagagagatgcttgtgc   |
| Region F FWD          | agaggacgcaccaattca    |
| Region F REV          | tcctccatggtcaagttgc   |
| GAPDH Promoter FWD    | cgggattgtctccctaattat |
| GAPDH Promoter REV    | gcacggaaggtcacgatgt   |
| NPPA-AS1 Promoter FWD | tcaccgttctctgtttctccc |
| NPPA-AS1 Promoter REV | caatggccgatggcaacaac  |
| NPPA-AS1 5' FWD       | gcttctgtttgcatcgg     |
| NPPA-AS1 5' REV       | cagaaaatgccctgggaact  |
| NPPA-AS1 GB1 FWD      | ggcagagaagtccatcaa    |
| NPPA-AS1 GB1 REV      | ccagtcaccaagccagata   |
| NPPA-AS1 GB2 FWD      | ggcagatcgtacagaggag   |
| NPPA-AS1 GB2 REV      | tgagtttatccttccctgt   |
| NPPA-AS1 3' FWD       | gagagacagaacctccca    |
| NPPA-AS1 3' REV       | acggcgtgagataaccaag   |
